# Supplementary material for: Surface Modification of Polyethylene Terephthalate Track-Etched Membranes by 2,2,3,3,4,4,5,5,6,6,7,7- Dodecafluoroheptyl Acrylate for Application in Water Desalination by Direct Contact Membrane Distillation
Source: Preprints.org preprint supplement (doi:10.20944/preprints202405.2082.v1), 2024-05-31
Supplement: Supplementary file 1 [file supplementary]

**Supplementary Materials**

**Figure S1**. FTIR spectra of initial and grafted membranes at different monomer concentration.

**Figure S2**. Water contact angle for initial (a) and modified PET TeMs with 10% DFHA (b), 20% DFHA (c) and 30% DFHA (d)

**Figure S3.** SEM images PET TeMs before (a) and after grafting. The monomer concentration: 10% (b), 20% (c) and 30% (d)
